# Supplementary material
Source: HighWire-hosted journal article supplement (https://www.annfammed.org/highwire/filestream/7790/field_highwire_adjunct_files/0/AFM-1-2-70-DC1.pdf.pdf)
Supplement: AFM-1-2-70-DC1.pdf.pdf [file AFM-1-2-70-DC1.pdf.pdf]

Online Supplementary Material

Guise JM, Palda V, Westhoff C, Chan BKS, Helfand M, Lieu TA. The effectiveness of primary care-based interventions to promote breastfeeding: systematic evidence review and meta-analysis for the US Preventive Services Task Force. *Ann Fam Med* 3002;1:70-78.

<http://www.annfammed.org/content/full/1/2/70>.

**Supplemental Table. Populations and Interventions  
in Studies of Clinically-based Interventions to Promote Breastfeeding**

| Quality                                                        | Number in<br>Control/Intervention<br>Group Design<br>Population                                                                         | Timing of<br>Intervention | Intervention(s) Conducted                                                                                                                                                                                                                        | Total<br>Time<br>Spent                 | Breastfeeding<br>Outcome<br>Measured |
|----------------------------------------------------------------|-----------------------------------------------------------------------------------------------------------------------------------------|---------------------------|--------------------------------------------------------------------------------------------------------------------------------------------------------------------------------------------------------------------------------------------------|----------------------------------------|--------------------------------------|
| <b>Sjolin et al, 1979,<sup>43</sup> Sweden</b>                 |                                                                                                                                         |                           |                                                                                                                                                                                                                                                  |                                        |                                      |
| Poor                                                           | 71/75<br>Non-RCT<br>Last 2 women to deliver on<br>Mondays<br>Swedish maternity ward                                                     | Postpartum                | <b>Support:</b> Pediatric visit in hospital<br>on days 1 and 4; in home at 2 wk,<br>6 wk, and 3 mo; calls weekly while<br>breastfeeding; home visit if problems                                                                                  | Not specified                          | Short-term<br>Long-term              |
| <b>Kaplowitz &amp; Olson, 1983,<sup>32</sup> United States</b> |                                                                                                                                         |                           |                                                                                                                                                                                                                                                  |                                        |                                      |
| Poor                                                           | 22/18<br>RCT<br>Low-income pregnant women<br>reporting having bottle-fed or<br>unsuccessfully breastfeeding<br>before WIC program in NY | Antepartum                | <b>Written Materials:</b> Series of<br>5 pamphlets mailed over 5 wk<br>to home                                                                                                                                                                   | Not applicable                         | Short-term                           |
| <b>Wiles, 1984,<sup>34</sup> United States</b>                 |                                                                                                                                         |                           |                                                                                                                                                                                                                                                  |                                        |                                      |
| Poor                                                           | 20/20<br>RCT<br>Pregnant women registered to<br>take prenatal classes<br>≥ 32 wk                                                        | Antepartum<br>(≥ 32 wk)   | <b>Education:</b> Group education<br>program                                                                                                                                                                                                     | Not specified                          | Short-term                           |
| <b>Jones &amp; West, 1985,<sup>37</sup> United Kingdom</b>     |                                                                                                                                         |                           |                                                                                                                                                                                                                                                  |                                        |                                      |
| Poor                                                           | 355/228<br>RCT<br>Postpartum women attempted to<br>breastfeed at least once<br>Maternity ward, district general<br>hospital             | Postpartum                | <b>Education:</b> Individual assistance<br>in hospital and home<br><b>Support:</b> Home visits                                                                                                                                                   | Not specified                          | Short-term<br>Long-term              |
| <b>Lynch et al, 1986,<sup>28</sup> Canada</b>                  |                                                                                                                                         |                           |                                                                                                                                                                                                                                                  |                                        |                                      |
| Fair                                                           | 135/135<br>RCT<br>Mostly low income<br>Urban maternity ward                                                                             | Postpartum                | <b>Support:</b> Home visits 2 h, calls<br>weekly                                                                                                                                                                                                 | 2 h plus                               | Long-term                            |
| <b>McEnery &amp; Roa, 1986,<sup>33</sup> United Kingdom</b>    |                                                                                                                                         |                           |                                                                                                                                                                                                                                                  |                                        |                                      |
| Poor                                                           | 34/35<br>RCT<br>Women < 16 wk pregnant<br>Indian subcontinent or Asians<br>from East Africa<br>London prenatal clinic                   | Antepartum                | <b>Education:</b> 90-min lectures                                                                                                                                                                                                                | 12 wk,<br>1 1/2 h each                 | Initiation                           |
| <b>Frank et al, 1987,<sup>27</sup> United States</b>           |                                                                                                                                         |                           |                                                                                                                                                                                                                                                  |                                        |                                      |
| Fair                                                           | 160/163<br>RCT<br>Women who had breastfed at<br>least once in hospital (65% black)<br>Urban maternity ward                              | Postpartum                | <b>Education:</b> Individual "counseling"<br>20-40 min in hospital<br><b>Support:</b> Phone contact after<br>discharge multiple times and<br>24-hr pager availability<br><b>Written Materials:</b> Research<br>discharge pack given at discharge | 20-40-min<br>counsel,<br>8 phone calls | Long-term                            |

| Quality                                                               | Number in Control/Intervention Group Design Population                                                                                                             | Timing of Intervention                       | Intervention(s) Conducted                                                                                                                                                                                                                     | Total Time Spent                                                                                                                         | Breastfeeding Outcome Measured        |
|-----------------------------------------------------------------------|--------------------------------------------------------------------------------------------------------------------------------------------------------------------|----------------------------------------------|-----------------------------------------------------------------------------------------------------------------------------------------------------------------------------------------------------------------------------------------------|------------------------------------------------------------------------------------------------------------------------------------------|---------------------------------------|
| <b>Hill, 1987,<sup>22</sup> United States</b>                         |                                                                                                                                                                    |                                              |                                                                                                                                                                                                                                               |                                                                                                                                          |                                       |
| Fair                                                                  | 33/31<br>RCT<br>Low-income pregnant women<br>University prenatal clinic                                                                                            | Antepartum                                   | <b>Education:</b> 40-min lecture/slides/discussion, 5–10-min question and answer after slide<br><b>Support:</b> Offered to all women breastfeeding<br><b>Written Materials:</b> Reinforced information in slide show after slide show in mail | 40 min                                                                                                                                   | Initiation<br>Short-term              |
| <b>Kistin et al, 1990,<sup>20</sup> United States</b>                 |                                                                                                                                                                    |                                              |                                                                                                                                                                                                                                               |                                                                                                                                          |                                       |
| Fair                                                                  | 56/38 group/36 individual<br>RCT<br>Low-income pregnant women attending midwife clinic before 24 wk<br>Cook County                                                 | Antepartum                                   | <b>Education:</b> 50–80-min individual or group classes                                                                                                                                                                                       | 50-80 min                                                                                                                                | Short-term                            |
| <b>Oakley &amp; Rajan, 1990,<sup>24</sup> United Kingdom</b>          |                                                                                                                                                                    |                                              |                                                                                                                                                                                                                                               |                                                                                                                                          |                                       |
| Fair                                                                  | 254/255<br>RCT<br>Pregnant women at risk for low-birth-weight infant<br>Prenatal clinics for 4 hospitals                                                           | Antepartum<br>(wk 14, 20, 28)                | <b>Support:</b> Home visit or phone call by certified nurse-midwife between 3 visits, also carried beeper available 24 h/d                                                                                                                    | 92% seen at least 3 times                                                                                                                | Initiation                            |
| <b>Roman, 1992,<sup>41</sup> United States</b>                        |                                                                                                                                                                    |                                              |                                                                                                                                                                                                                                               |                                                                                                                                          |                                       |
| Fair                                                                  | 89/90<br>Non-RCT<br>Pregnant women at 6 mo in prenatal clinic                                                                                                      | Antepartum                                   | <b>Education:</b> 2-hr individual audiovisual training session                                                                                                                                                                                | 2 h                                                                                                                                      | Initiation                            |
| <b>Serafino-Cross &amp; Donovan, 1992,<sup>25</sup> United States</b> |                                                                                                                                                                    |                                              |                                                                                                                                                                                                                                               |                                                                                                                                          |                                       |
| Fair                                                                  | 26/26<br>RCT<br>Pregnant women intending to breastfeed, first time or previously unsuccessful<br>Prenatal clinics in Springfield, Mass                             | Antepartum                                   | <b>Support:</b> Home visit in 1st 2 mo lasting 30-60 min, average 5-8 visits, also available by phone                                                                                                                                         | 5-8 visits of 30-60 min                                                                                                                  | Short-term<br>Long-term               |
| <b>Kistin et al, 1994,<sup>47</sup> United States</b>                 |                                                                                                                                                                    |                                              |                                                                                                                                                                                                                                               |                                                                                                                                          |                                       |
| Poor                                                                  | 43/59<br>Non-RCT<br>Pregnant or postpartum women intending to breastfeed and requesting support from counselor, low-income delivered at public hospital in Chicago | Antepartum<br>Postpartum                     | <b>Support:</b> Peer counselor                                                                                                                                                                                                                | Not specified                                                                                                                            | Initiation<br>Short-term              |
| <b>Rossiter, 1994,<sup>35</sup> Australia</b>                         |                                                                                                                                                                    |                                              |                                                                                                                                                                                                                                               |                                                                                                                                          |                                       |
| Poor                                                                  | 86/108<br>RCT<br>Pregnant women > 12 wk<br>Vietnamese immigrants<br>3 hospitals in Australia                                                                       | Antepartum<br>(> 12 wk)<br>timed with visits | <b>Education:</b> 25-min video followed by 3, 2-h small-group discussions<br><b>Written Materials:</b> Controls received breastfeeding pamphlets                                                                                              | 25 min, plus 3, 2-h discussions                                                                                                          | Initiation<br>Long-term               |
| <b>Brent et al, 1995,<sup>23</sup> United States</b>                  |                                                                                                                                                                    |                                              |                                                                                                                                                                                                                                               |                                                                                                                                          |                                       |
| Fair                                                                  | 57/51<br>RCT<br>Low-income pregnant women<br>Prenatal clinics in Pittsburgh                                                                                        | Antepartum<br>Postpartum                     | <b>Education:</b> Individual education 2-4 visits for 10–15-min sessions with lactation consultant<br><b>Support:</b> Lactation consultant visits                                                                                             | 2-4 visits of 10-15 min, phone call 8 h after discharge, lactation clinic visit and lactation consultant at each clinic visit for 1 year | Initiation<br>Short-term<br>Long-term |

| Quality                                                           | Number in Control/Intervention Group Design Population                                                                                                                                          | Timing of Intervention            | Intervention(s) Conducted                                                                                                                                                                                                                                                                                | Total Time Spent    | Breastfeeding Outcome Measured |
|-------------------------------------------------------------------|-------------------------------------------------------------------------------------------------------------------------------------------------------------------------------------------------|-----------------------------------|----------------------------------------------------------------------------------------------------------------------------------------------------------------------------------------------------------------------------------------------------------------------------------------------------------|---------------------|--------------------------------|
| <b>Redman et al, 1995,<sup>29</sup> United Kingdom</b>            |                                                                                                                                                                                                 |                                   |                                                                                                                                                                                                                                                                                                          |                     |                                |
| Fair                                                              | 85/81<br>RCT<br>Primiparous women intending to breastfeed<br>Suburban Australia<br>Postpartum                                                                                                   | Antepartum<br>(24-28 wk)          | <b>Education:</b> 3-hr teaching classes by lactation specialist,<br>Discussion groups at 6-8 wk postpartum<br><b>Support:</b> Visit in hospital lasting 34 min, home visits at request, calls at 2-3 wk and 3 mo and at request<br><b>Written Materials:</b> Written package given during hospital visit | Not specified       | Short-term<br>Long-term        |
| <b>Sciaccia et al, 1995,<sup>26</sup> United States</b>           |                                                                                                                                                                                                 |                                   |                                                                                                                                                                                                                                                                                                          |                     |                                |
| Poor                                                              | 34/34<br>RCT<br>Pregnant women<br>Intervention group received many financial and gift incentives<br>WIC program in Arizona                                                                      | Antepartum<br>Postpartum          | <b>Education:</b> 60-120-min session for patient and partner<br><b>Support:</b> Peer counselor available for assistance for both groups<br>Gift incentives for intervention include pump, gift bag, football tickets for partner                                                                         | 1-2 h               | Initiation<br>Short-term       |
| <b>Serwint et al, 1996,<sup>36</sup> United States</b>            |                                                                                                                                                                                                 |                                   |                                                                                                                                                                                                                                                                                                          |                     |                                |
| Poor                                                              | 75/81<br>RCT<br>Low-income nulliparous pregnant women between 8-28 wk<br>University prenatal clinics                                                                                            | Antepartum<br>(32-36 wk)          | Education: Visit by pediatrician                                                                                                                                                                                                                                                                         | Not specified       | Initiation                     |
| <b>Barwick et al, 1997,<sup>42</sup> United Kingdom</b>           |                                                                                                                                                                                                 |                                   |                                                                                                                                                                                                                                                                                                          |                     |                                |
| Poor                                                              | 19/19<br>Non-RCT<br>Urdu-speaking pregnant women intending to breastfeed<br>United Kingdom                                                                                                      | Antepartum                        | <b>Education:</b> Home video                                                                                                                                                                                                                                                                             |                     | Short-term                     |
| <b>Curro et al, 1997,<sup>30</sup> Italy</b>                      |                                                                                                                                                                                                 |                                   |                                                                                                                                                                                                                                                                                                          |                     |                                |
| Good                                                              | 97/103<br>RCT<br>Primiparous women with healthy infants with birth weights $\geq 2500$ g, exclusively breastfeeding on enrollment<br>Outpatient pediatric clinic of Catholic University of Rome | Postpartum<br>10-12 d after birth | <b>Education:</b> Both groups received 10-min individual counseling on breastfeeding<br><b>Written Materials:</b> Instructions for breastfeeding                                                                                                                                                         | 10 min plus booklet | Long-term                      |
| <b>Duffy et al, 1997,<sup>19</sup> Australia</b>                  |                                                                                                                                                                                                 |                                   |                                                                                                                                                                                                                                                                                                          |                     |                                |
| Fair                                                              | 35/35<br>RCT<br>Primiparous women > 36 wk gestational age<br>Public hospital maternity ward                                                                                                     | Antepartum                        | <b>Education:</b> 1-h class teaching position and attachment of baby                                                                                                                                                                                                                                     |                     | Short-term                     |
| <b>Loh et al, 1997,<sup>31</sup> Ireland</b>                      |                                                                                                                                                                                                 |                                   |                                                                                                                                                                                                                                                                                                          |                     |                                |
| Poor                                                              | 95/98<br>RCT<br>Pregnant women > 36 wk gestation, in prenatal clinic in University College Galway                                                                                               | Antepartum<br>(> 36 wk)           | <b>Written Materials:</b> Fact sheet covering 8 benefits of breastfeeding with reinforcing questionnaire                                                                                                                                                                                                 | Not applicable      | Initiation<br>Short-term       |
| <b>Reifsnider &amp; Eckhart, 1997,<sup>45</sup> United States</b> |                                                                                                                                                                                                 |                                   |                                                                                                                                                                                                                                                                                                          |                     |                                |
| Poor                                                              | 24/23<br>Non-RCT<br>Pregnant WIC participants intending to breastfeed<br>Oklahoma                                                                                                               | Antepartum                        | <b>Education:</b> Breastfeeding education in group classroom format<br><b>Support:</b> At follow-up visits patients offered food voucher or formula voucher                                                                                                                                              | Not specified       | Initiation                     |

| Quality                                                                                                                                       | Number in Control/Intervention Group Design Population                                                                                                                                                           | Timing of Intervention                    | Intervention(s) Conducted                                                                                                                                                                                                                                                                                                                                                                                                                                                                        | Total Time Spent | Breastfeeding Outcome Measured |
|-----------------------------------------------------------------------------------------------------------------------------------------------|------------------------------------------------------------------------------------------------------------------------------------------------------------------------------------------------------------------|-------------------------------------------|--------------------------------------------------------------------------------------------------------------------------------------------------------------------------------------------------------------------------------------------------------------------------------------------------------------------------------------------------------------------------------------------------------------------------------------------------------------------------------------------------|------------------|--------------------------------|
| <b>Caulfield et al, 1998,<sup>44</sup> United States</b>                                                                                      |                                                                                                                                                                                                                  |                                           |                                                                                                                                                                                                                                                                                                                                                                                                                                                                                                  |                  |                                |
| Poor                                                                                                                                          | 57 control/64 video/55 peer counselor/66 video + peer counselor<br>Non-RCT<br>African American pregnant women who were WIC eligible receiving prenatal care before 24 wk<br>4 Baltimore prenatal clinics         | Antepartum                                | <b>Education:</b> Motivational video played continuously in waiting room for intervention group: 8 vignettes 2-5 min each barriers, benefits - largely prenatal<br><b>Support:</b> Peer counselor - before and after delivery, attitudes, misconceptions, 1-on-1 and group support. 3 or more times in pregnancy then weekly up to 16 wk postpartum at clinic, home or phone<br><b>Written Materials:</b> Pamphlet given to video-intervention group and breast-feeding by WIC service providers | Not specified    | Initiation<br>Short-term       |
| <b>Pugh &amp; Milligan, 1998,<sup>21</sup> United States</b>                                                                                  |                                                                                                                                                                                                                  |                                           |                                                                                                                                                                                                                                                                                                                                                                                                                                                                                                  |                  |                                |
| Fair                                                                                                                                          | 30/30<br>RCT<br>Primiparous women within 24 h of vaginal delivery at term<br>Community hospital                                                                                                                  | Postpartum, 3-4 d and 12 d after delivery | <b>Education:</b> 2 visits from community health nurse to observe technique and teach, second visit offered nonnursing help (eg, dishes, child-care)<br>Both visits included advice on dealing with fatigue and depression<br><b>Support:</b> 1 phone call by lactation specialist                                                                                                                                                                                                               | Not specified    | Long-term                      |
| <b>Schafer et al, 1998,<sup>46</sup> United States</b>                                                                                        |                                                                                                                                                                                                                  |                                           |                                                                                                                                                                                                                                                                                                                                                                                                                                                                                                  |                  |                                |
| Poor                                                                                                                                          | 64/72<br>Non-RCT<br>Pregnant and postpartum women in 2 intervention counties and 6 control counties in Iowa (differences in breastfeeding rates preintervention, lower in intervention counties, 22.5% vs 27.5%) | Antepartum<br>Postpartum                  | <b>Support:</b> 1-on-1 education, in-person and phone support addressed concerns                                                                                                                                                                                                                                                                                                                                                                                                                 | Variable         | Initiation<br>Short-term       |
| <b>Howard et al, 2000,<sup>39</sup> United States</b>                                                                                         |                                                                                                                                                                                                                  |                                           |                                                                                                                                                                                                                                                                                                                                                                                                                                                                                                  |                  |                                |
| Poor                                                                                                                                          | 235/209<br>RCT<br>Pregnant women attending first prenatal visit in 1 of 6 outpatient clinics in Rochester, New York                                                                                              | Antepartum                                | <b>Miscellaneous:</b> Commercial discharge packet including formula advertising and can of formula                                                                                                                                                                                                                                                                                                                                                                                               | Not applicable   | Initiation<br>Short-term       |
| <b>McInnes et al, 2000,<sup>48</sup> Scotland</b>                                                                                             |                                                                                                                                                                                                                  |                                           |                                                                                                                                                                                                                                                                                                                                                                                                                                                                                                  |                  |                                |
| Poor                                                                                                                                          | 472/447<br>Non-RCT<br>Low-income prenatal clinics in community Glasgow (target communities with community control selection arbitrary)                                                                           | Antepartum                                | <b>Support:</b> 2 prenatal and 2 postnatal visits                                                                                                                                                                                                                                                                                                                                                                                                                                                | Not specified    | Initiation<br>Short-term       |
| <b>Escobar et al, 2001,<sup>38</sup> United States</b>                                                                                        |                                                                                                                                                                                                                  |                                           |                                                                                                                                                                                                                                                                                                                                                                                                                                                                                                  |                  |                                |
| Good                                                                                                                                          | 506/508<br>RCT<br>Low-risk postpartum women with healthy infants with birth weights 2,500-4,600 g<br>Within Kaiser Permanente Medical Care Program Santa Clara Home Health Services area, postpartum unit        | Postpartum                                | <b>Support:</b> Control group received hospital-based follow-up (group visits, 1-on-1 clinic visits, breastfeeding consultation)                                                                                                                                                                                                                                                                                                                                                                 |                  |                                |
| <b>Kramer et al, 2001,<sup>40</sup> Canada</b>                                                                                                |                                                                                                                                                                                                                  |                                           |                                                                                                                                                                                                                                                                                                                                                                                                                                                                                                  |                  |                                |
| Fair                                                                                                                                          | 141/140<br>RCT<br>Postpartum women breastfeeding healthy singleton infants at a University postpartum unit in Montreal                                                                                           | Postpartum                                | <b>Miscellaneous:</b> Encouraged not to use pacifiers                                                                                                                                                                                                                                                                                                                                                                                                                                            |                  | Long-term                      |
| Note: Control groups received usual care unless otherwise specified.<br>RCT = randomized controlled trial; WIC = Women, Infants and Children. |                                                                                                                                                                                                                  |                                           |                                                                                                                                                                                                                                                                                                                                                                                                                                                                                                  |                  |                                |
